# Supplementary material
Source: HighWire-hosted journal article supplement (https://ijssurgery.com/content/16/4/706)
Supplement: inline-supplementary-material-1 [file inline-supplementary-material-1.docx]

**Supplemental Table 1.** ICD9 Diagnostic Codes Utilized to Access Comorbidity Status

| **Comorbidity** | **ICD9 Code** |
| --- | --- |
| **Hypertension** | *4010:4059* |
| **Smoking Status** | *3051, V1582* |
| **Obesity** | *2780,27800,27801,27802,27803* |
| **Rheumatoid Arthritis** | *7140,7142* |
| **Chronic Kidney Disease** | *585,5851,5852,5853,5854,5855,5856,5859,7925* |
| **Diabetes** | *24900:25099,7902,79021,79022,79029,7915,7916* |
| **Osteoporosis** | *73300, 73301, 73302, 73303, 73309* |
