# Supplementary material
Source: HighWire-hosted journal article supplement (https://ijssurgery.com/content/16/4/706)
Supplement: inline-supplementary-material-2 [file inline-supplementary-material-2.docx]

**Supplemental Table 2.** ICD9 Diagnostic Codes Utilized to Access Perioperative Complications

| Complication | ICD9 Code |
| --- | --- |
| Pseudarthrosis | *733.82* |
| Revision Surgery | *813.6, 813.7, 813.8* |
