# Supplementary material
Source: HighWire-hosted journal article supplement (https://ijssurgery.com/content/16/4/706)
Supplement: inline-supplementary-material-3 [file inline-supplementary-material-3.docx]

**Supplemental Table 3.** Total Unmatched Population Characteristics of Patients Undergoing Single-Level Anterior Lumbar Interbody Fusion Surgeries

| **Parameters** | **Total**  **n=22,380** | **BMP Utilized in Procedure**  **n=9,045** | **No BMP Utilized in Procedure**  **n=13,335** | **p-value** |
| --- | --- | --- | --- | --- |
| **Age** *n (%)* | | | | <0.05 |
| 65 – 69 | 9,336 (41.7) | 3,906 (43.2) | 5,430 (40.7) |
| 70 – 74 | 6,978 (31.2) | 2,796 (30.9) | 4,182 (31.4) |
| 75 – 79 | 4,284 (19.1) | 1,695 (18.7) | 2,589 (19.4) |
| 80 – 84 | 1,782 (8.0) | 648 (7.2) | 1,134 (8.5) |
| **Sex** *n (%)* | | | | 0.84 |
| Male | 8,130 (36.3) | 3,278 (36.2) | 4,852 (36.4) |
| Female | 14,250 (63.7) | 5,767 (63.8) | 8,483 (63.6) |
| **Comorbidities** *n (%)* | | | | |
| Body Mass Index > 30 kg/m2 | 1,285 (5.7) | 497 (5.5) | 788 (5.9) | 0.20 |
| Diabetes Mellitus | 4,695 (21.0) | 1,761 (19.5) | 2,934 (22.0) | <0.05 |
| Chronic Kidney Disease | 975 (4.4) | 367 (4.1) | 608 (4.6) | 0.08 |
| Hypertension | 11,575 (51.7) | 4,601 (50.9) | 6,974 (52.3) | <0.05 |
| Rheumatoid Arthritis | 759 (3.4) | 313 (3.5) | 446 (3.3) | 0.67 |
| Osteoporosis | 2,080 (9.3) | 857 (9.5) | 1,223 (9.2) | 0.46 |
| Smoking | 2,281 (10.2) | 886 (9.8) | 1,395 (10.5) | 0.11 |
| **Postoperative Complications** *n (%)* | | | | |
| Pseudarthrosis | 366 (1.6) | 178 (2.0) | 188 (1.4) | <0.05 |
| Revision Surgery | 805 (3.6) | 334 (3.7) | 471 (3.5) | 0.55 |
